# Supplementary material
Source: Frontiers journal article supplement (https://www.frontiersin.org/articles/174124)
Supplement: Presentation_1.PDF [file Presentation_1.PDF]

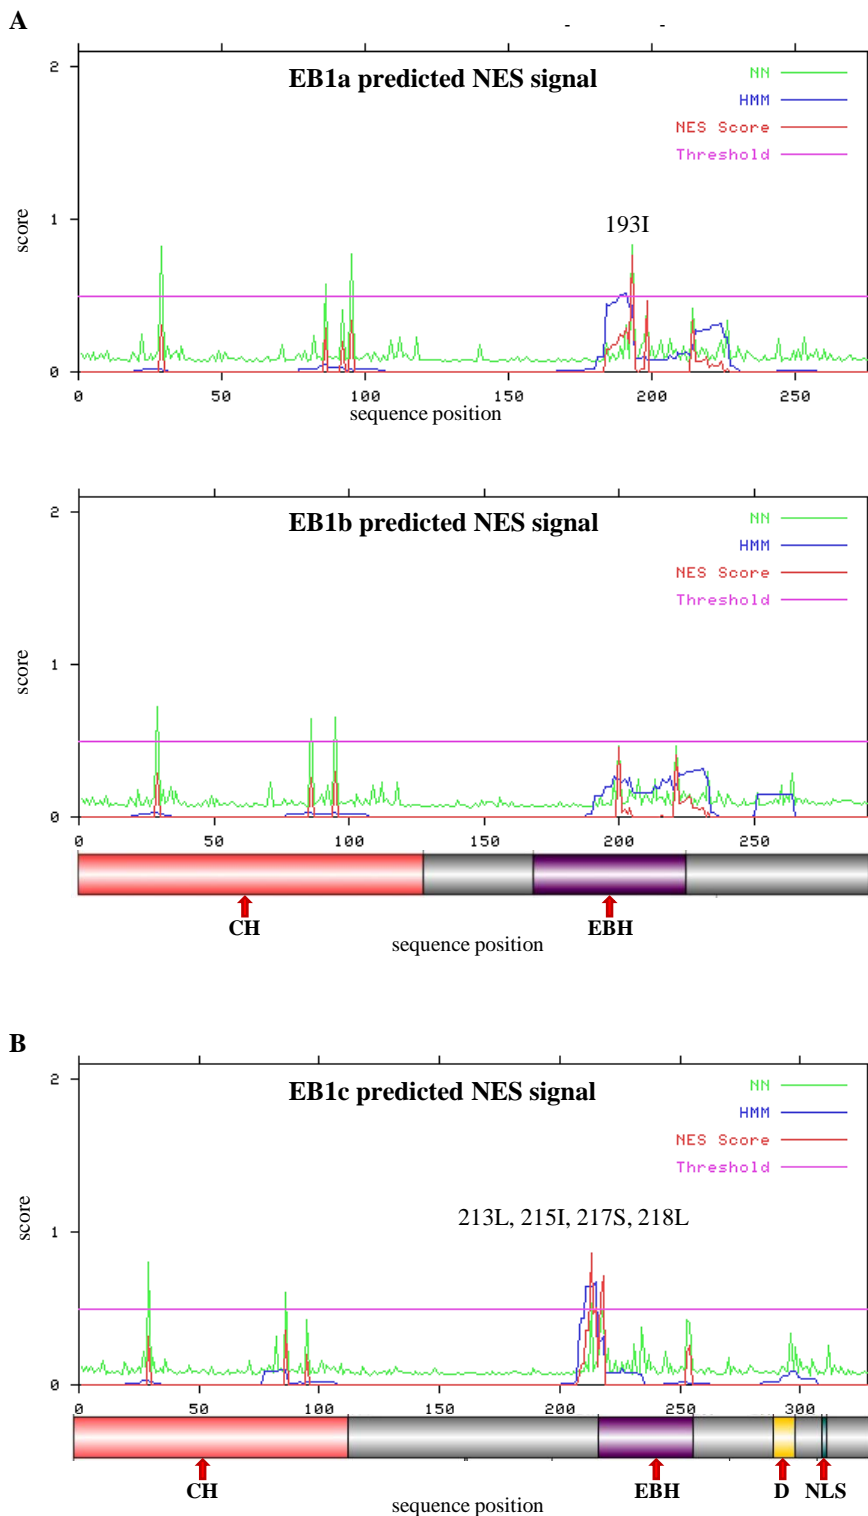

**SUPPLEMENTARY FIGURE 1. Predictions of putative nuclear export sequences in EB1a/EB1b and EB1c proteins using the NetNES 1.1 server (La Cour, et al., 2004).**

(A) Analysis of EB1a and EB1b proteins showed one putative NES at the position 193I in EB1a protein; however, the score is low over the threshold. Main domains are marked at the DOG protein model (<http://dog.biocuckoo.org/>). (B) Analysis of EB1c protein showed four putative NES at the positions 213L, 215I, 217S, 218L. Main domains, D-motif and putative NLS are marked at the DOG protein model of EB1c. NN - neural network algorithm; HMM:Hidden Markov Model algorithm; NES score:combination of NN and HMM algorithms; CH: calponin homology domain; EBH: end binding homology domain; D: D domain (serves as a platform for interaction with MAPK).
